# Supplementary material for: A novel fluorescent probe for Au(iii)/Au(i) ions based on an intramolecular hydroamination of a Bodipy derivative and its application to bioimaging
Source: Royal Society of Chemistry journal article supplement (doi:10.1039/c1cc16128h), 2011-11-28
Supplement: c1cc16128h.pdf [file c1cc16128h.pdf]

## Electronic Supplementary Information (ESI) for

# A novel fluorescent probe for Au(III)/Au(I) ions based on an intramolecular hydroamination of a BODIPY derivatives and its application to bioimaging

Jian-Bo Wang,<sup>a</sup> Qing-Qing Wu,<sup>a</sup> Yuan-Zeng Min,<sup>b</sup> Yang-Zhong Liu,<sup>b</sup> Qin-Hua Song<sup>\*a</sup>

<sup>a</sup>*Department of Chemistry, <sup>b</sup>CAS Key Laboratory of Soft Matter Chemistry, University of Science and*

*Technology of China, Hefei 230026, China*

E-mail: [qhsong@ustc.edu.cn](mailto:qhsong@ustc.edu.cn)

## Table of Contents

|                                                                                |        |
|--------------------------------------------------------------------------------|--------|
| I. General methods                                                             | S2–4   |
| II. Synthesis Procedures and Characterization of New Compounds                 | S5–9   |
| III. Copies of <sup>1</sup> H and <sup>13</sup> C NMR Spectra of New Compounds | S10–15 |

## I. General methods

General chemicals were of the best grade available and were used without further purification.  $^1\text{H}$  and  $^{13}\text{C}$  NMR spectra were measured with a Bruker AV spectrometer operating at 300M and 75MHz, respectively and chemical shifts were reported in ppm using tetramethylsilane (TMS) as the internal standard. FT-IR spectra were measured with a Bruker Vector22 Infrared Spectrometer. Mass spectra were obtained with a Micromass GCF TOF mass spectrometer. UV-vis absorption and fluorescence emission spectra were performed at room temperature with a Shimadzu UV-2450 UV-vis spectrometer and Perkin-Elmer Instruments LS55 Luminescence Spectrometer, respectively.

**Cell culture and fluorescence imaging** HeLa cells were grown in Dulbecco's modified eagle Medium supplemented with 10% fetal calf serum, 1% penicillin, and 10000 unit/mL of streptomycin at 37°C under humidified air containing 5%  $\text{CO}_2$ . Cells (50000) were located and stabilized in a single well of 24-well plate. Fluorescence imaging of the cells treated with probe **1** and  $\text{Au}^{3+}$  were undertaken by a confocal microscope (Zeiss LSM 510 Meta NLO), excitation wavelength was 480nm.

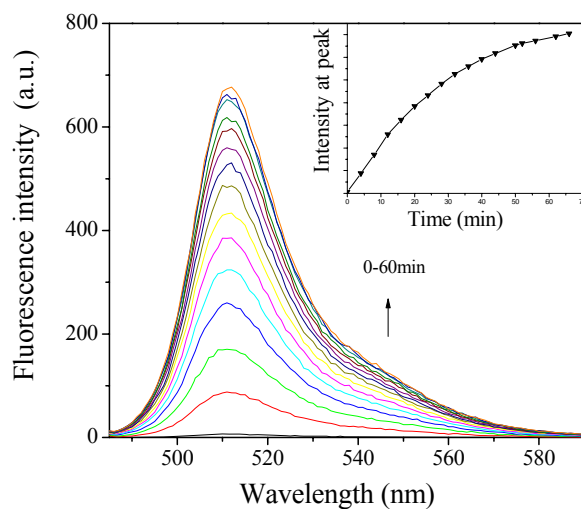

**Figure S1** Time-dependent fluorescence spectral changes of probe **1** (5 μM) with addition of 5.0 equiv Au<sup>+</sup> in EtOH/0.01M PBS buffer (1:1, v/v, pH 7.4), excitation at 480 nm. Insert : Time dependent fluorescence intensity changes (at 511nm) of **1** with Au<sup>+</sup>.

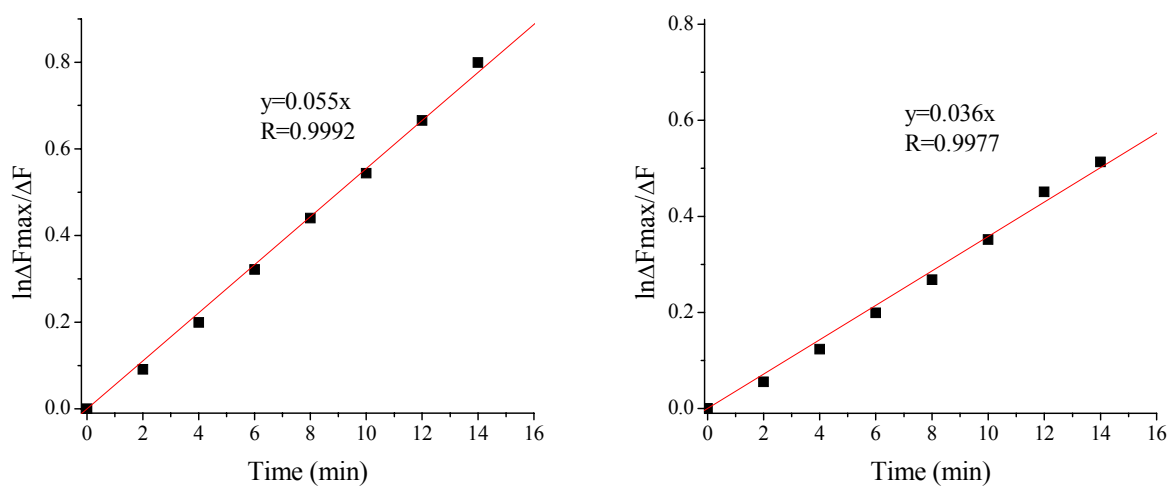

**Figure S2** Kinetic analysis of probe **1** (5 μM) with 5 equiv. of gold ions in EtOH/0.01M PBS buffer (1:1, v/v, pH 7.4). Left: Au<sup>3+</sup>; right: Au<sup>+</sup>.

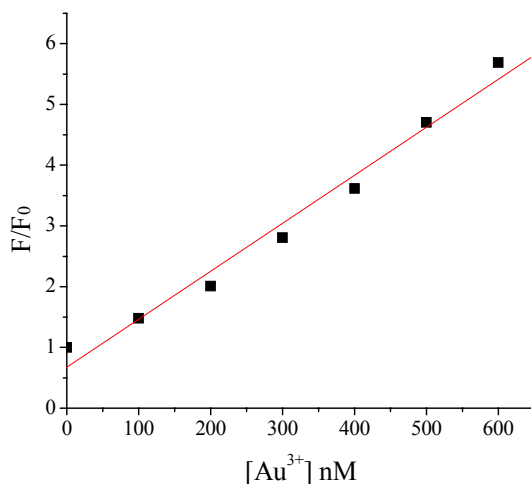

**Figure S3** Fluorescence intensity changes ( $F/F_0$  at 511nm) of probe **1** ( $5 \mu\text{M}$ ) with  $\text{AuCl}_3$  (in the range of  $0.1 \mu\text{M}$  -  $0.6 \mu\text{M}$ ) in EtOH/ $0.01\text{M}$  PBS buffer (1:1, v/v, pH 7.4), excitation at 480 nm. All the fluorescence data were observed after 30 min.

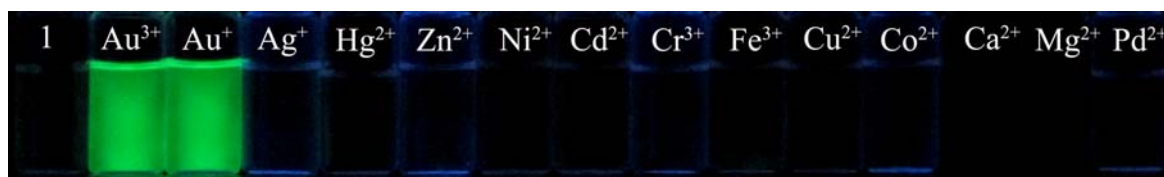

**Figure S4** Fluorescence photographs of probe **1** ( $5 \mu\text{M}$ ) with 5 equiv. of different metal ions in EtOH/ $0.01\text{M}$  PBS buffer (1:1, v/v, pH 7.4).

## II. Synthesis Procedures and Characterization of New Compounds

Starting materials 2-bromo-1-iodo-4-methylbenzene<sup>1</sup>, 4-bromo-3-nitrobenzaldehyde<sup>2</sup> and 3, 5-dimethyl-4-(ethoxycarbonyl)pyrrole<sup>3</sup> were prepared according to published procedures. All other chemical were purchased from commercial suppliers and were used as received without further purification.

**3-(2-bromo-4-methylphenyl)prop-2-yn-1-ol (3):** Pd(PPh<sub>3</sub>)<sub>2</sub>Cl<sub>2</sub> (165 mg, 5 mol%) and CuI (89 mg, 10 mol%) were placed in a two necked dry round bottom flask equipped with magnetic stir bar. The flask was evacuated and refilled with N<sub>2</sub> three times. The 2-bromo-1-iodo-4-methylbenzene (1.4 g, 4.7 mmol) and propargyl alcohol (318 mg, 5.7 mmol) were dissolved in triethylamine (25 ml) and added to the flask with the catalyst. The mixture was stirred at room temperature for 12 h and was stopped by addition of water and ethyl acetate (EtOAc). The organic phase was separated, washed several times with water, dried over MgSO<sub>4</sub> and evaporated. Purified using flash chromatography and **3** was obtained as yellow oil (0.68 g, 64%). *R<sub>f</sub>* = 0.45, (EtOAc / petroleum ether 1:5); IR:  $\nu(\text{tilde}) = 3343\text{s}, 2921\text{m}, 2964\text{m}, 2227\text{m}, 1600\text{s}, 1488\text{s}, 1025\text{s}, 819\text{s} \text{ cm}^{-1}$ ; <sup>1</sup>H NMR (300Hz, CDCl<sub>3</sub>):  $\delta = 7.41 \text{ (s, 1H)}, 7.35 \text{ (d, } J=7.8\text{Hz, 1H)}, 7.06 \text{ (d, } J=7.8\text{Hz, 1H)}, 4.54 \text{ (s, 2H)}, 2.33 \text{ (s, 3H)}, 1.69 \text{ (s, 1H)}$ ; <sup>13</sup>C NMR (75Hz, CDCl<sub>3</sub>):  $\delta = 140.2, 133.1, 132.7, 127.8, 125.0, 121.4, 90.9, 84.1, 51.5, 20.9$ ; TOFMS (EI) calcd for (M<sup>+</sup>) C<sub>10</sub>H<sub>9</sub>OBr: 223.9837, found 223.9825.

**2-bromo-1-(3-methoxyprop-1-ynyl)-4-methylbenzene (4):** The compound **3** (2.7 g, 12 mmol) was dissolved in THF (25 ml) and the solution was cooled to 0°C with an ice bath before NaH (60% in mineral oil) (0.58 g, 14.4 mmol) was added portion wise. The mixture was stirred at this temperature 30 min. Then, MeI (0.9 ml, 14.4 mmol) was added and the reaction was stirred at room temperature for additional 12 h. The reaction was stopped by addition of sat.NH<sub>4</sub>Cl solution and EtOAc. The organic phase was separated, washed several times with water, dried over MgSO<sub>4</sub> and

evaporated. Purified using flash chromatography and **4** as yellow oil was obtained (2.5g, 87%).  $R_f = 0.42$ , (petroleum ether); IR:  $\nu(\text{tilde}) = 2926\text{m}, 2821\text{m}, 2229\text{m}, 1600\text{s}, 1488\text{s}, 1356\text{s}, 1100\text{s}, 819\text{s}$   $\text{cm}^{-1}$ ;  $^1\text{H}$  NMR (300Hz,  $\text{CDCl}_3$ ):  $\delta = 7.41$  (s, 1H), 7.36 (d,  $J=7.8\text{Hz}$ , 1H), 7.06 (d,  $J=7.8\text{Hz}$ , 1H), 4.37 (s, 2H), 3.49 (s, 3H), 2.33 (s, 3H);  $^{13}\text{C}$  NMR (75Hz,  $\text{CDCl}_3$ ):  $\delta = 140.1, 133.1, 132.7, 127.7, 125.1, 121.6, 88.7, 84.8, 60.2, 57.5, 20.9$ ; TOFMS (EI) calcd for ( $\text{M}^+$ )  $\text{C}_{11}\text{H}_{11}\text{OBr}$ : 237.9993, found 237.9988.

**2'-(3-methoxyprop-1-yn-1-yl)-5'-methyl-2-nitro-[1,1'-biphenyl]-4-carbaldehyde (5):** n-BuLi (3.7 ml, 2.2 M, 8.1mmol, 1.2 eq) was added dropwise to a solution of compound **4** (1.6 g, 6.7 mmol) in anhyd THF (30 mL) at  $-78^\circ\text{C}$ . The mixture was stirred at this temperature for 30 min, then  $\text{B}(\text{O}^i\text{Pr})_3$  (13.4 mmol, 2eq) was added and the mixture was stirred for 16 h while allowing the temperature to rise to  $20^\circ\text{C}$ . The HCl (24 mL, 2 M) was added, the organic layer separated, the aqueous layer extracted with diethyl ether (50 ml) three times, the combined organic layer dried over  $\text{MgSO}_4$ , and concentrated under reduce pressure. The product was obtained as white solid by flash chromatography (0.62g, 45%) and was used directly for next step reaction.

Boronic acid (0.62 g, 3 mmol), 4-bromo-3-nitrobenzaldehyde (0.71g, 3.1 mmol) and  $\text{Pd}(\text{PPh}_3)_4$  (0.22 g, 0.31 mmol, 10 mol%) were added into a 100 mL flask. Degassed toluene (40 mL), ethanol (20 ml) and degassed aqueous  $\text{K}_2\text{CO}_3$  solution (5 mL, 2 M) was then added into the flask. The solution was kept at  $80^\circ\text{C}$  and stirred vigorously under nitrogen for 24 h. The resulting solution was extracted with excess  $\text{CH}_2\text{Cl}_2$ , dried by  $\text{MgSO}_4$ , and evaporated. Purified by flash chromatography and **5** was obtained as a white solid (0.67g, 66%).  $R_f = 0.28$ , (EtOAc / petroleum ether 1:10); IR (KBr):  $\nu(\text{tilde}) = 2946\text{m}, 2876\text{m}, 2228\text{m}, 1702\text{s}, 1530\text{s}, 1353\text{s}, 1100\text{s}, 946\text{s}, 828\text{s}$   $\text{cm}^{-1}$ ;  $^1\text{H}$  NMR (300Hz,  $\text{CDCl}_3$ ):  $\delta = 10.13$  (s, 1H), 8.51 (d,  $J=1.2\text{Hz}$ , 1H), 8.17-8.14 (m, 1H), 7.62 (d,  $J=7.8\text{Hz}$ , 1H), 7.45 (d,  $J=7.8\text{Hz}$ , 1H), 7.26-7.20 (m, 1H), 7.13 (s, 1H), 4.09 (s, 2H), 3.19 (s, 3H), 2.42 (s, 3H);  $^{13}\text{C}$

NMR (75Hz, CDCl<sub>3</sub>):  $\delta$  = 189.4, 149.2, 140.8, 140.7, 139.0, 135.9, 133.5, 132.3, 132.0, 129.2, 128.5, 124.8, 117.9, 88.5, 83.6, 59.7, 56.9, 21.1; TOFMS (EI) calcd for (M<sup>+</sup>) C<sub>18</sub>H<sub>15</sub>NO<sub>4</sub>: 309.1001, found 309.0999.

**2,8-bis(ethoxycarbonyl)-5,5-difluoro-10-(2'-(3-methoxyprop-1-yn-1-yl)-5'-methyl-2-nitro-[1,1'-biphenyl]-4-yl)-1,3,7,9-tetramethyl-5H-dipyrrolo[1,2-c:2',1'-f][1,3,2]diazaborinin-4-ium-5-uide (6):**

The compound **5** (0.54 g, 1.7 mmol) and 3,5-dimethyl-4-(ethoxycarbonyl)pyrrole (0.58 g, 3.5 mmol) were dissolved in 150 ml of absolute CH<sub>2</sub>Cl<sub>2</sub> under an N<sub>2</sub> atmosphere. Three drop of TFA was added, and the solution was stirred at room temperature overnight. When TLC monitoring showed complete consumption of **5**, a solution of DDQ (0.43 g, 1.9 mmol) in CH<sub>2</sub>Cl<sub>2</sub> was added, and stirring was continued for 20 min. The reaction mixture was washed with water, dried over Na<sub>2</sub>SO<sub>4</sub>, filtered, and evaporated. The compound was purified by short column chromatography over alumina (CH<sub>2</sub>Cl<sub>2</sub>). The brown powder thus obtained and TEA (4 ml, 28 mmol) were dissolved in 200 ml of toluene under an N<sub>2</sub> atmosphere. Then BF<sub>3</sub>-Et<sub>2</sub>O (4 ml, 32 mmol) was added, and the solution was stirred at room temperature for 30 min. The reaction mixture was washed with water, dried over Na<sub>2</sub>SO<sub>4</sub>, filtered, and evaporated. Purified using flash chromatography and **6** as a red solid was obtained (0.28g, 24%). *R<sub>f</sub>* = 0.47, (EtOAc / petroleum ether 1:4); IR (KBr):  $\nu$ (tilde) = 2983m, 2932m, 1706s, 1530s, 1315s, 1187s, 1007s, 564s cm<sup>-1</sup>; <sup>1</sup>H NMR (300Hz, CDCl<sub>3</sub>):  $\delta$  = 8.02 (s, 1H), 7.65-7.61 (m, 2H), 7.48 (d, *J*=7.8Hz, 1H), 7.26-7.21 (m, 2H), 4.34-4.27(m, 4H), 4.07 (s, 2H), 3.31 (s, 3H), 2.86 (s, 6H), 2.45 (s, 3H), 1.80 (s, 6H), 1.35 (t, *J*=7.2Hz, 6H); <sup>13</sup>C NMR (75Hz, CDCl<sub>3</sub>):  $\delta$  = 163.8, 160.4, 149.6, 146.8, 141.5, 139.2, 139.1, 137.2, 134.8, 134.0, 132.4, 132.0, 131.0, 129.3, 128.8, 124.0, 123.0, 118.4, 88.5, 83.7, 60.3, 59.9, 57.5, 21.3, 14.9, 14.1, 14.0; HRMS (ESI) calcd for (M+H)<sup>+</sup> C<sub>36</sub>H<sub>37</sub>O<sub>7</sub>BN<sub>3</sub>F<sub>2</sub>: 672.2687, found 672.2685.

**10-(2-amino-2'-(3-methoxyprop-1-yn-1-yl)-5'-methyl-[1,1'-biphenyl]-4-yl)-2,8-bis(ethoxycarbo**

**nyl)-5,5-difluoro-1,3,7,9-tetramethyl-5H-dipyrrolo[1,2-c:2',1'-f][1,3,2]diazaborinin-4-ium-5-uide**

**de (1):** Tin(II) chloride (168 mg, 0.75mmol) and con. HCl (1ml) were added to a solution of compound **6** (50mg, 0.075mmol) in THF-EtOH (1:1, 14 ml), and the reaction mixture was stirred for 6 h. A sat.solution of K<sub>2</sub>CO<sub>3</sub> was added and the reaction mixture was partitioned between EtOAc (40.0 ml) and water (10ml). The organic phase was separated, washed several times with water, dried over MgSO<sub>4</sub> and evaporated. Purified using flash chromatography and **1** as a red solid was obtained (36mg, 75%). *R<sub>f</sub>* = 0.27, (EtOAc / petroleum ether 1:4); IR (KBr):  $\nu(\text{tilde}) = 3482\text{m}, 3382\text{m}, 2980\text{m}, 2932\text{m}, 1710\text{s}, 1689\text{s}, 1619\text{s}, 1521\text{s}, 1314\text{s}, 1186\text{s}, 1109\text{s}, 1010, 566\text{s cm}^{-1}$ ; <sup>1</sup>H NMR (300Hz, CDCl<sub>3</sub>):  $\delta = 7.51$  (d, *J*=7.8Hz, 1H), 7.30-7.18 (m, 3H), 6.84-6.78 (m, 2H), 4.33-4.26 (m, 4H), 4.10 (s, 2H), 3.33 (s, 3H), 2.84 (s, 6H), 2.41 (s, 3H), 1.91 (s, 6H), 1.34 (t, *J*=7.2Hz, 6H); <sup>13</sup>C NMR (75Hz, CDCl<sub>3</sub>):  $\delta = 164.2, 159.2, 147.7, 146.2, 145.2, 140.4, 139.3, 134.4, 133.2, 131.8, 131.3, 130.7, 128.7, 127.9, 122.3, 119.3, 116.8, 113.9, 87.4, 84.7, 60.1, 60.0, 57.5, 21.3, 14.8, 14.2, 13.6$ ; HRMS (ESI) calcd for (M+H)<sup>+</sup> C<sub>36</sub>H<sub>39</sub>O<sub>5</sub>BN<sub>3</sub>F<sub>2</sub>: 642.2945, found 642.2938.

**2,8-bis(ethoxycarbonyl)-5,5-difluoro-10-(6-(2-methoxyethyl)-9-methylphenanthridin-3-yl)-1,3,**

**7,9-tetramethyl-5H-dipyrrolo[1,2-c:2',1'-f][1,3,2]diazaborinin-4-ium-5-uide (2):** AuCl<sub>3</sub> (10 mmol%) was added to the solution of compound **1** (20 mg, 0.031 mmol) in 20ml EtOH, and the reaction mixture was stirred for 4h. The solvent was evaporated and water (30ml) was added. The aqueous phase was extracted with EtOAc, the combined organic extract was dried over MgSO<sub>4</sub> and evaporated. Purified using flash chromatography and **2** as a red solid was obtained (9 mg, 45%). *R<sub>f</sub>* = 0.31, (EtOAc / petroleum ether 1:4); IR (KBr):  $\nu(\text{tilde}) = 3439\text{m}, 2962\text{m}, 2925\text{m}, 1709\text{s}, 1628\text{s}, 1523\text{s}, 1314\text{s}, 1184\text{s}, 1118\text{s}, 1075\text{s}, 562\text{s cm}^{-1}$ ; <sup>1</sup>H NMR (300Hz, CDCl<sub>3</sub>):  $\delta = 8.80$  (d, *J*=8.7Hz, 1H), 8.57 (s, 1H), 8.46 (d, *J*=6.9Hz, 1H), 7.77-7.70 (m, 2H), 7.54-7.51 (m, 1H), 4.31 (t, *J*=6.9Hz, 2H), 4.29-4.22 (m, 4H), 4.10-4.08 (m, 2H), 3.37 (s, 3H), 2.86 (s, 6H), 2.76 (s, 3H), 1.61 (s, 6H), 1.30 (t,



$J=6.9\text{Hz}$ , 6H); HRMS (ESI) calcd for  $(\text{M}+\text{H})^+$   $\text{C}_{36}\text{H}_{39}\text{O}_5\text{BN}_3\text{F}_2$ : 642.2945, found 642.2949.

## References

1. R. S. Liu, H. K. Chang, S. Datta, A. Das and A. Odedra, *Angew. Chem. Int. Edit.*, 2007, **46**, 4744.
2. P. Swoboda, R. Saf, K. Hummel, F. Hofer and R. Czaputa, *Macromolecules*, 1995, **28**, 4255.
3. S. C. Burdette, D. P. Kennedy and C. M. Kormos, *J. Am. Chem. Soc.*, 2009, **131**, 8578.

### III. Copies of $^1\text{H}$ and $^{13}\text{C}$ NMR Spectra of New Compounds

$^1\text{H}$  NMR (300 MHz) spectra of compound **3**

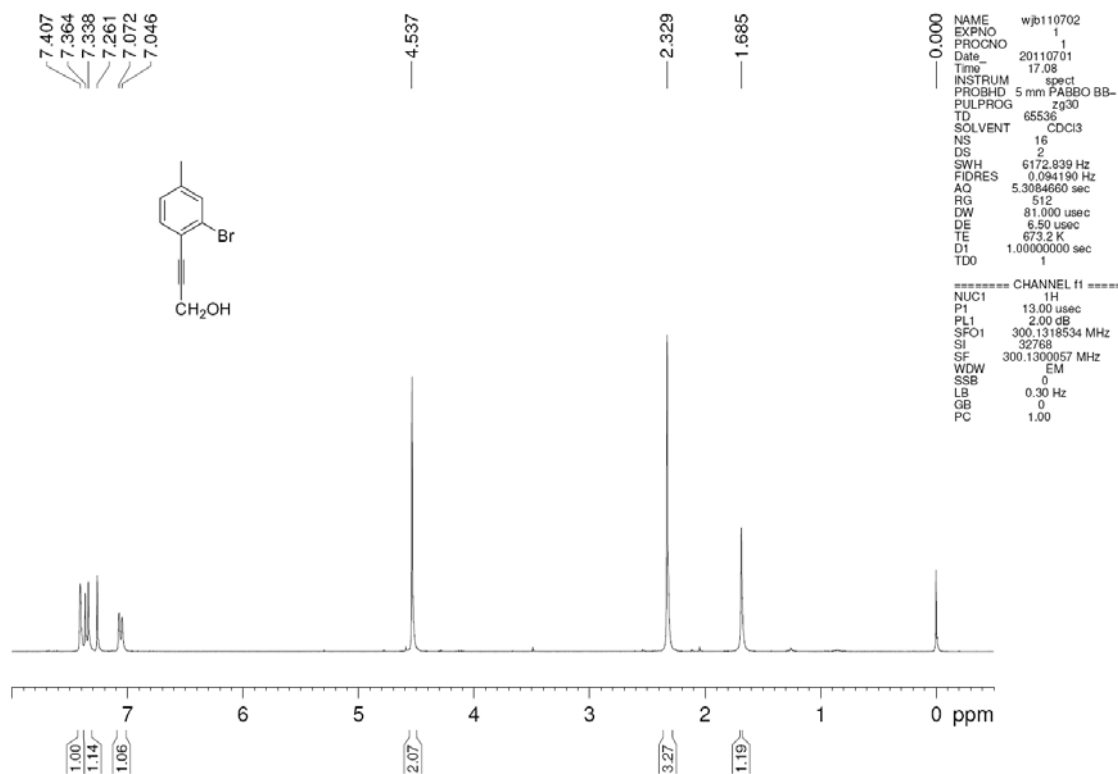

$^{13}\text{C}$  NMR (75 MHz) spectra of compound **3**

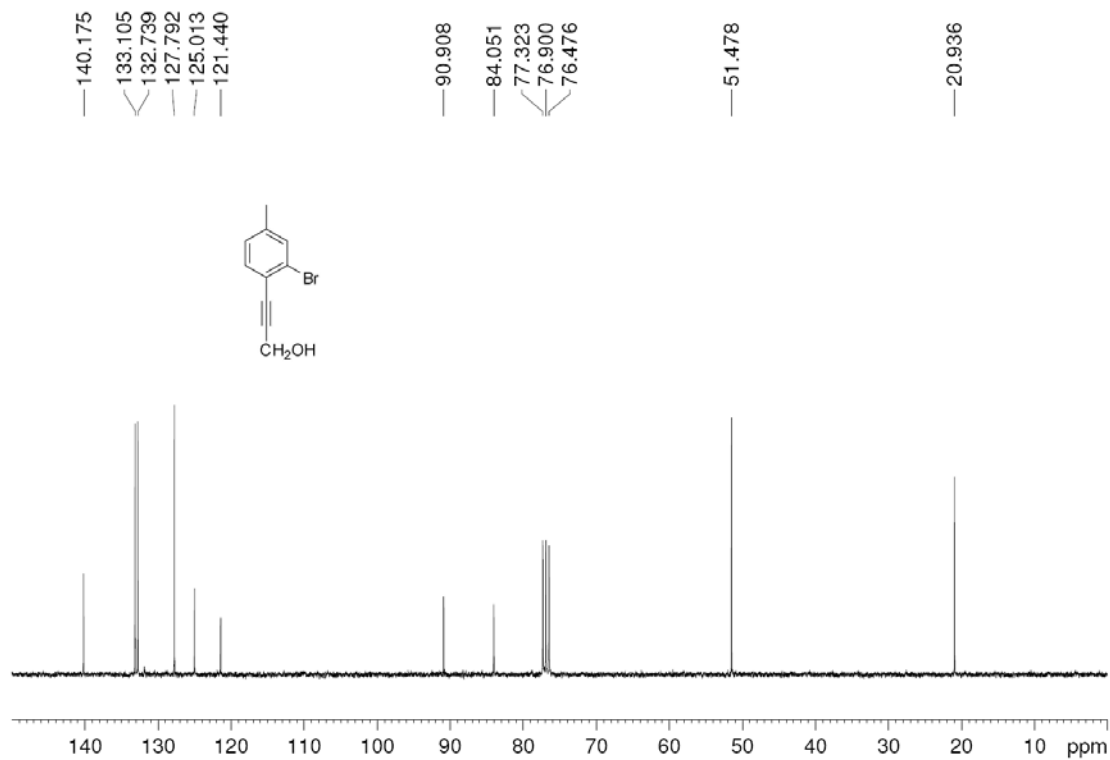

### <sup>1</sup>H NMR (300 MHz) spectra of compound 4

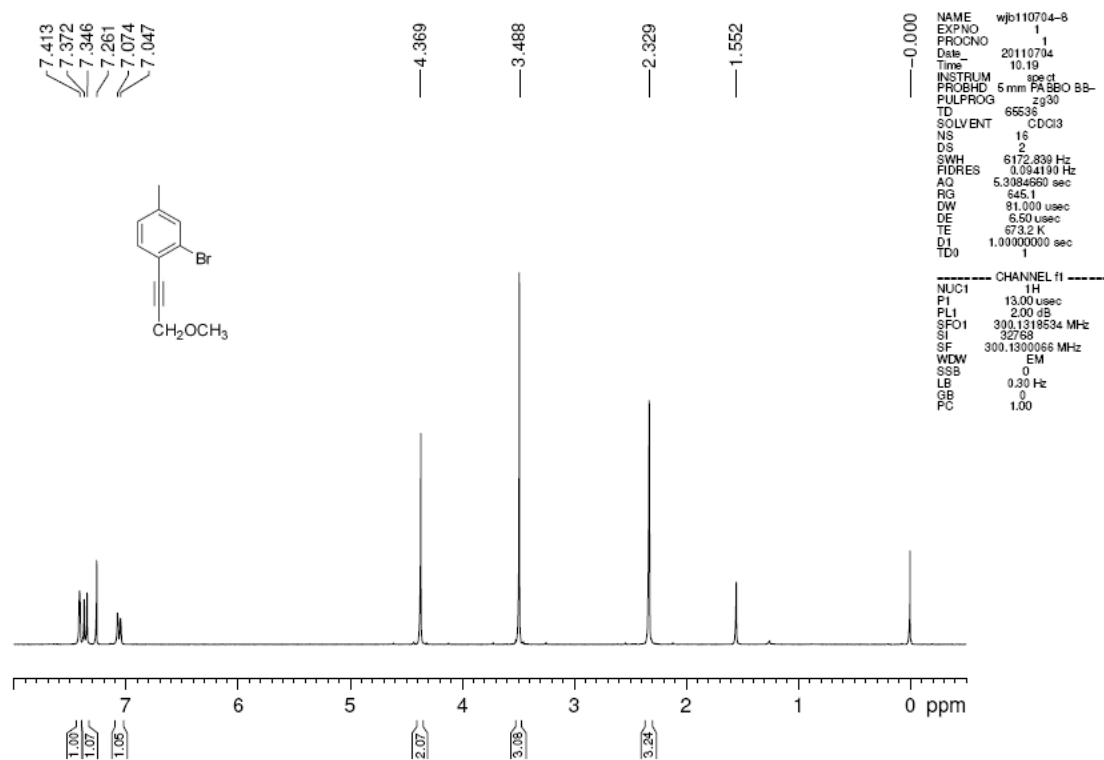

### <sup>13</sup>C NMR (75 MHz) spectra of compound 4

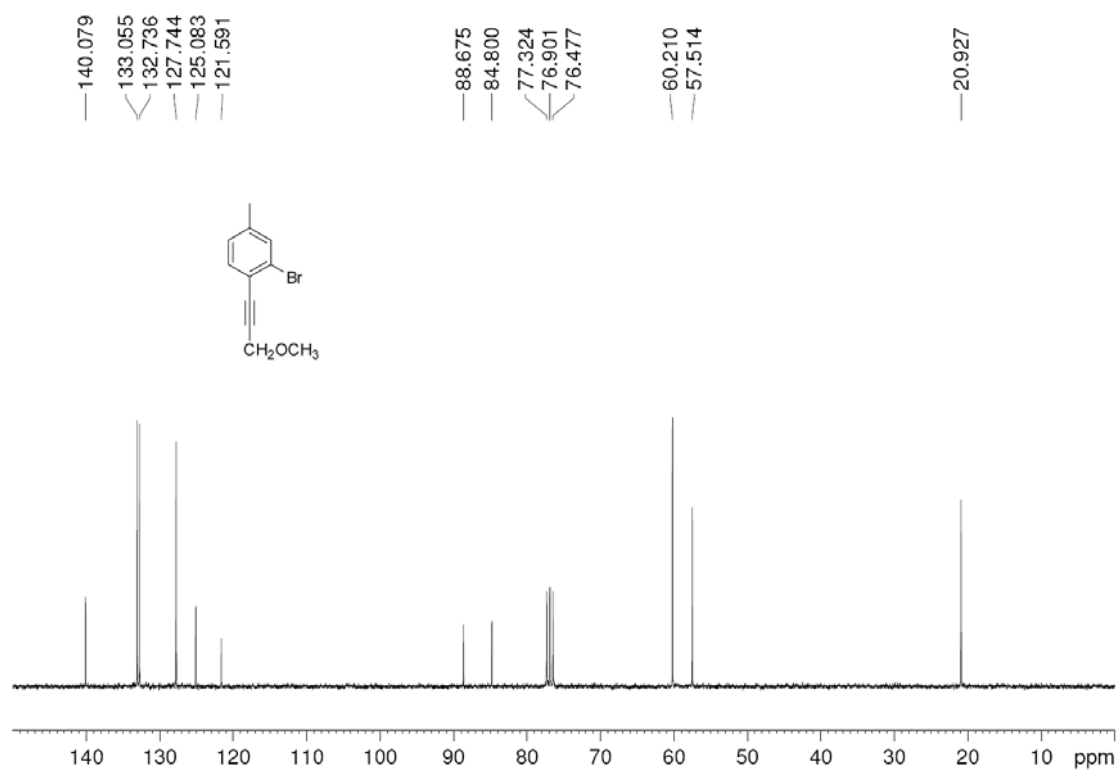

### <sup>1</sup>H NMR (300 MHz) spectra of compound **5**

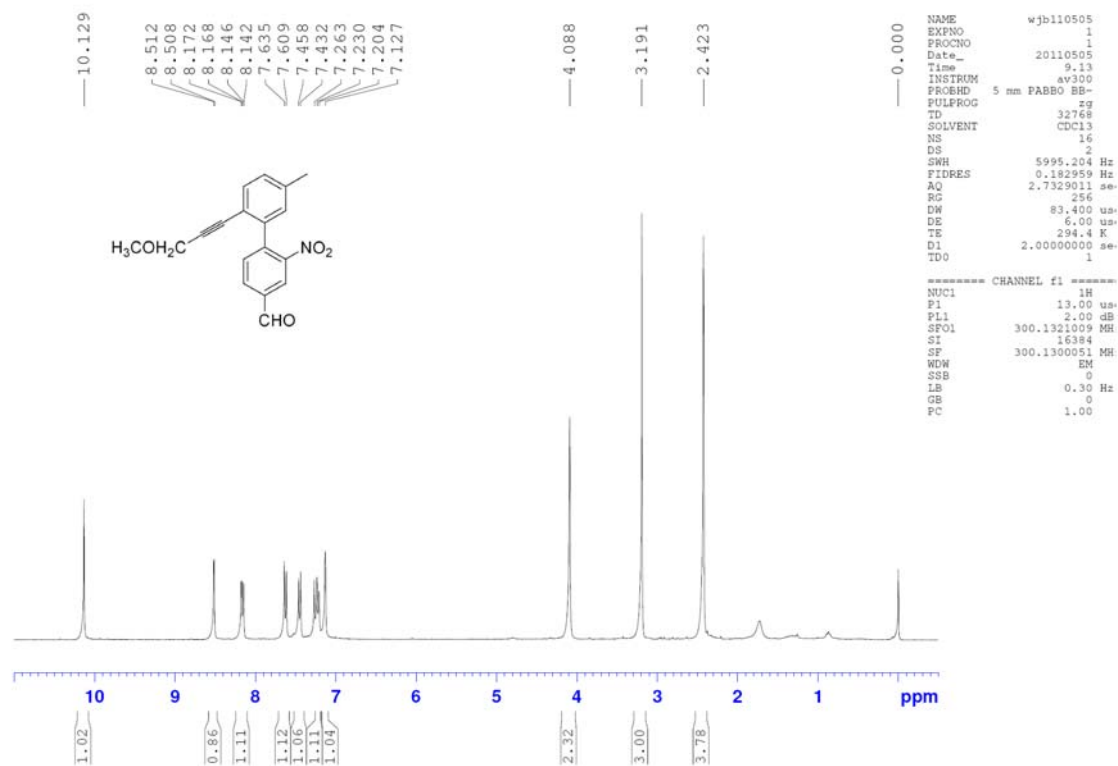

### <sup>13</sup>C NMR (75 MHz) spectra of compound **5**

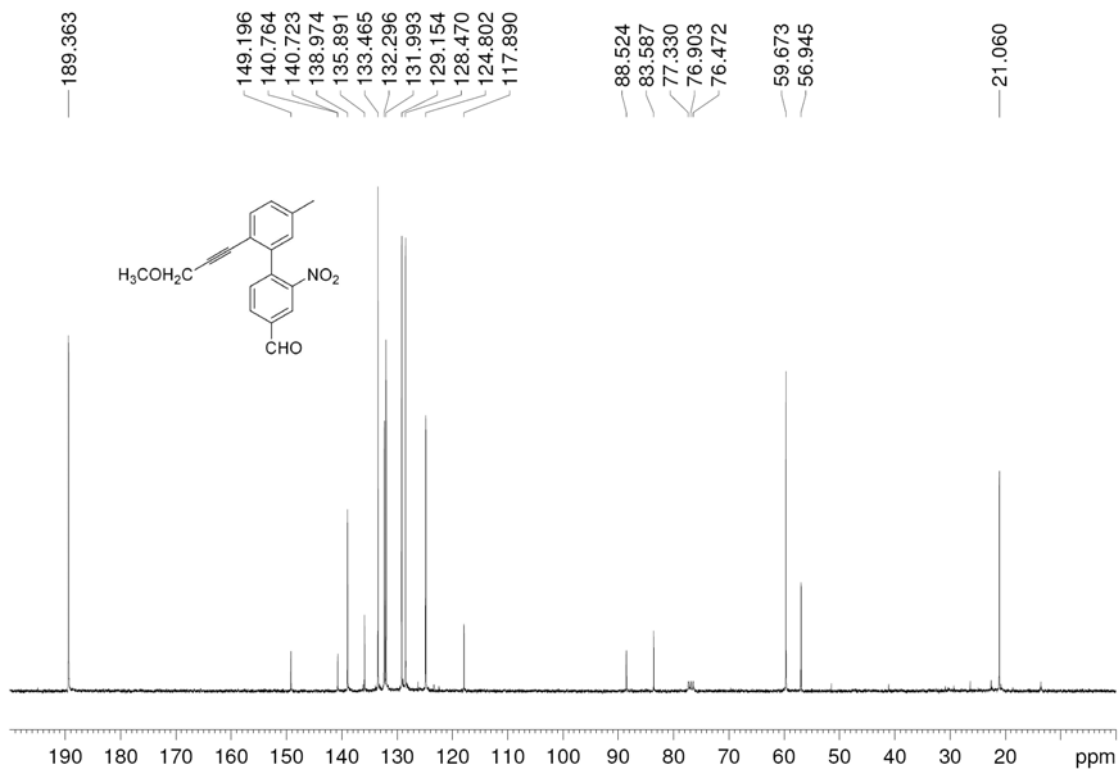

<sup>1</sup>H NMR (300 MHz) spectra of compound 6

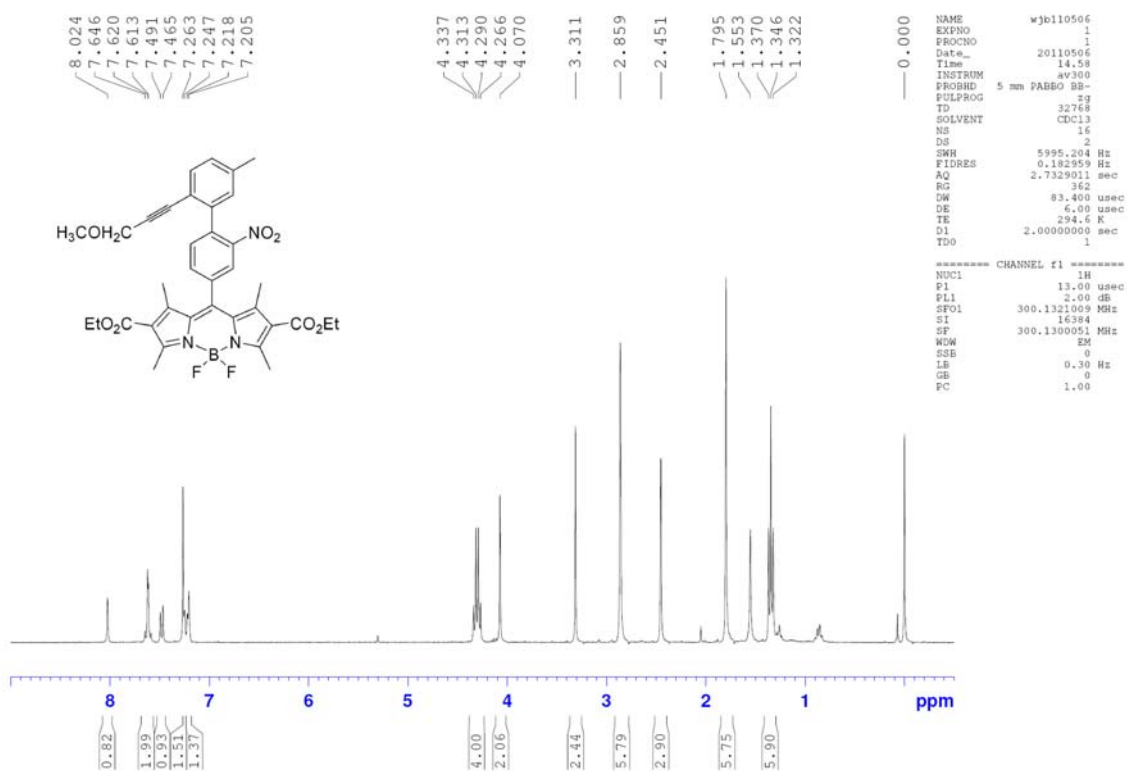

<sup>13</sup>C NMR (75 MHz) spectra of compound 6

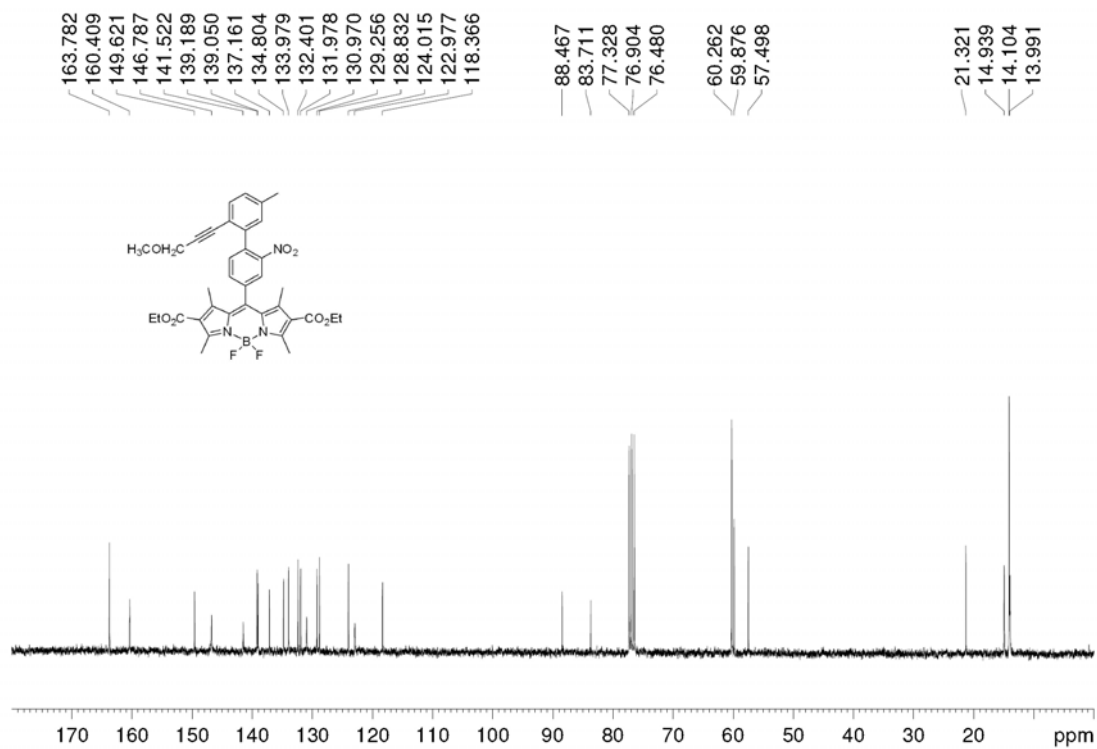



<sup>1</sup>H NMR (300 MHz) spectra of compound 2

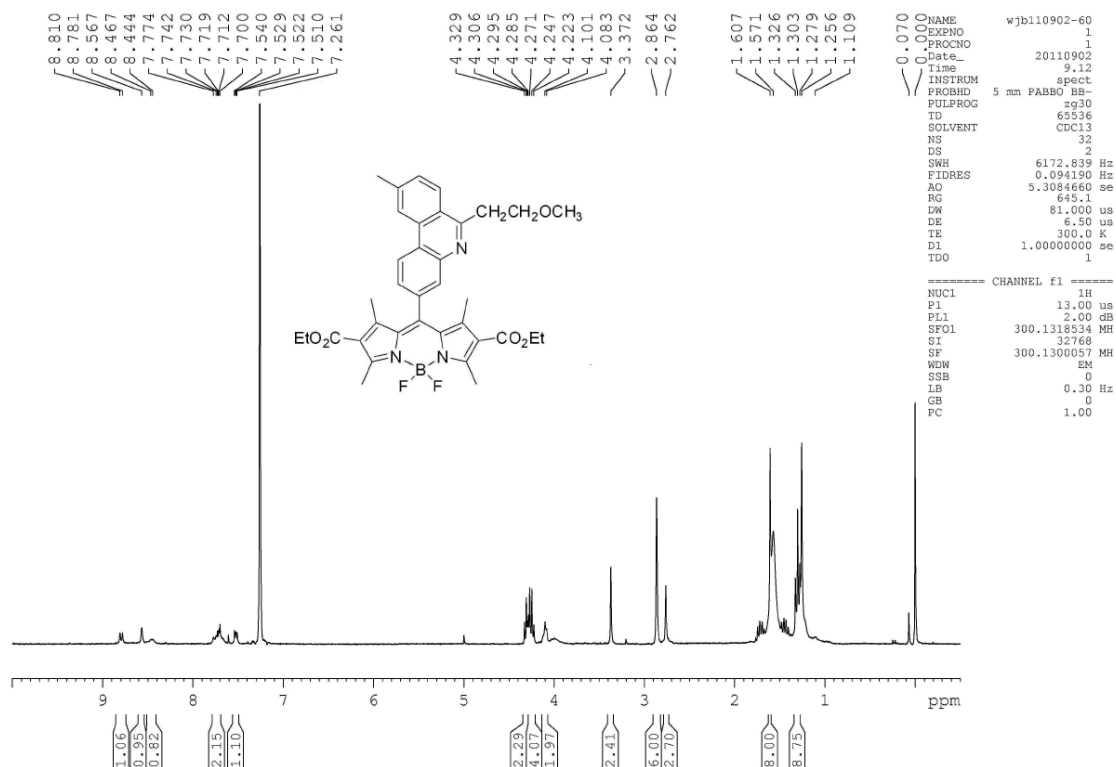

ESI mass spectral of compound 2 [M+H<sup>+</sup>]

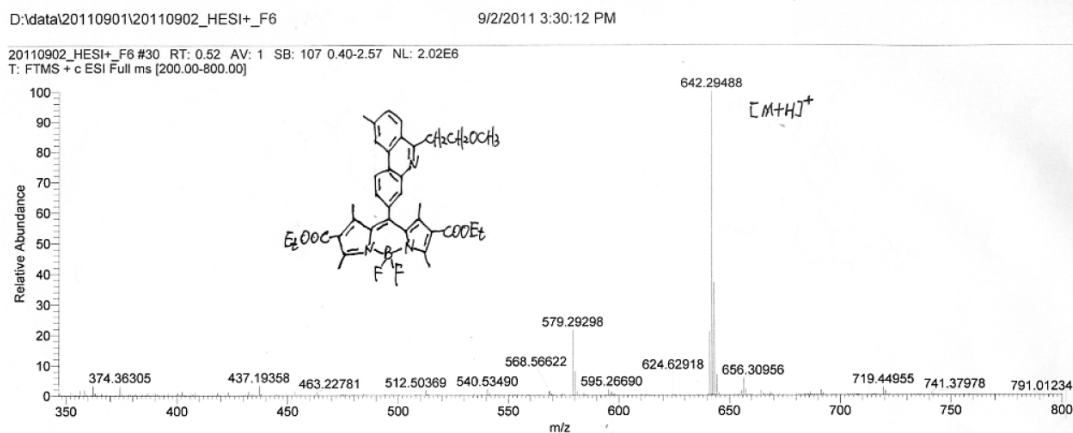

20110902 HESI+ F6#30 RT: 0.52  
 SB: 107 0.40-2.57  
 T: FTMS + c ESI Full ms [200.00-800.00]  
 m/z= 346.64537-800.00000

| m/z       | Intensity | Relative | Theo. Mass | Delta (amu) | Composition                                                                   |
|-----------|-----------|----------|------------|-------------|-------------------------------------------------------------------------------|
| 362.32673 | 62561.6   | 3.10     | 362.32649  | 0.24        | C <sub>20</sub> H <sub>44</sub> O <sub>4</sub> N                              |
| 374.36305 | 64198.0   | 3.18     | 374.36287  | 0.18        | C <sub>22</sub> H <sub>48</sub> O <sub>3</sub> N                              |
| 437.19358 | 65486.3   | 3.24     | 437.19301  | 0.58        | C <sub>25</sub> H <sub>27</sub> O <sub>5</sub> BF                             |
| 579.29298 | 434235.5  | 21.49    | 579.29166  | 1.32        | C <sub>35</sub> H <sub>41</sub> O <sub>5</sub> F <sub>2</sub>                 |
| 580.29640 | 160474.7  | 7.94     | 580.29700  | -0.60       | C <sub>36</sub> H <sub>39</sub> O <sub>3</sub> N <sub>3</sub> F               |
| 641.29815 | 421264.9  | 20.85    |            |             |                                                                               |
| 642.29488 | 2020494.8 | 100.00   | 642.29453  | 0.35        | C <sub>36</sub> H <sub>39</sub> O <sub>5</sub> N <sub>3</sub> BF <sub>2</sub> |
| 643.29787 | 745539.6  | 36.90    | 643.30236  | -4.49       | C <sub>36</sub> H <sub>40</sub> O <sub>5</sub> N <sub>3</sub> BF <sub>2</sub> |
| 644.30084 | 136572.0  | 6.76     | 644.31018  | -9.35       | C <sub>36</sub> H <sub>41</sub> O <sub>5</sub> N <sub>3</sub> BF <sub>2</sub> |
| 656.30956 | 112259.0  | 5.56     |            |             |                                                                               |
